# Supplementary material for: Increased efficiency in identifying mixed pollen samples by meta-barcoding with a dual-indexing approach
Source: PubMed Central journal article supplement (PMC4509727; doi:10.1186/s12898-015-0051-y), 2015-07-22
Supplement: 12898_2015_51_MOESM1_ESM.pdf [file 12898_2015_51_MOESM1_ESM.pdf]

## Plant Species documented near solitary bee nest sites

### No. Species

- 1 *Abies spp.*
- 2 *Acer campestre*
- 3 *Acer spp.*
- 4 *Achillea millefolium*
- 5 *Achillea spp.*
- 6 *Acinos arvensis*
- 7 *Actaea spicata*
- 8 *Aegopodium podagraria*
- 9 *Aesculus spp.*
- 10 *Agrimonia eupatoria*
- 11 *Ajuga genevesis*
- 12 *Ajuga pyramidalis*
- 13 *Ajuga reptans*
- 14 *Allaria petiolata*
- 15 *Allium spp.*
- 16 *Allium ursinum*
- 17 *Alnus spp.*
- 18 *Anagallis arvensis*
- 19 *Anagallis foemina*
- 20 *Anemone ranunculoides*
- 21 *Anemone spp.*
- 22 *Anemone sylvestris*
- 23 *Anthemis tinctoria*
- 24 *Anthericum ramosum*
- 25 *Anthriscus sylvestris*
- 26 *Anthyllis vulneraria*
- 27 *Aquilegia vulgaris*
- 28 *Arctium lappa*
- 29 *Arctium tomentosum*
- 30 *Arnica spp.*
- 31 *Aster amellus*
- 32 *Aster linosyris*
- 33 *Ballota nigra*
- 34 *Barbarea vulgaris*
- 35 *Bellis perennis*
- 36 *Berberis vulgaris*
- 37 *Betula spp.*
- 38 *Brassica napus*
- 39 *Bryonia dioica*
- 40 *Bunias orientalis*
- 41 *Bupleurum falcatum*
- 42 *Calystegia sepium*
- 43 *Campanula glomerata*
- 44 *Campanula patula*

- 45 *Campanula persifolia*
- 46 *Campanula rapunculoides*
- 47 *Campanula rotundifolia*
- 48 *Campanula* spp.
- 49 *Campanula trachelium*
- 50 *Capsella bursa-pastoris*
- 51 *Cardamine pratensis*
- 52 *Carlina vulgaris*
- 53 *Caronum carvi*
- 54 *Carpinus* spp.
- 55 *Centaurea cyanus*
- 56 *Centaurea jacea*
- 57 *Centaurea montana*
- 58 *Centaurea scabiosa*
- 59 *Centaurea* spp.
- 60 *Centaurium erythraea*
- 61 *Cephalanthera rubra*
- 62 *Cephalanthera* spp.
- 63 *Cerastium arvense*
- 64 *Chelidonium majus*
- 65 *Cichorium intybus*
- 66 *Cirsium acaule*
- 67 *Cirsium arvense*
- 68 *Cirsium eriophorum*
- 69 *Cirsium* spp.
- 70 *Cirsium vulgare*
- 71 *Clematis vitalba*
- 72 *Clinopodium vulgare*
- 73 *Colchicum autumnale*
- 74 *Consolida regalis*
- 75 *Convallaria majalis*
- 76 *Convolvulus arvensis*
- 77 *Cornus mas*
- 78 *Cornus sanguinea*
- 79 *Coronilla* spp.
- 80 *Corydalis cava*
- 81 *Corylus avellana*
- 82 *Crataegus leavigata*
- 83 *Crataegus monogyna*
- 84 *Crataegus* spp.
- 85 *Crepis biennis*
- 86 *Crepis* spp.
- 87 *Delphinium* spp.
- 88 *Dianthus carthusianorum*
- 89 *Digitalis grandiflora*
- 90 *Dipsacus fullonum*
- 91 *Echinops sphaerocephalus*

- 92 *Echium vulgare*
- 93 *Epilobium angustifolium*
- 94 *Epilobium hirsutum*
- 95 *Erigeron annuus*
- 96 *Erodium cicutarium*
- 97 *Erophila verna*
- 98 *Eryngium spp.*
- 99 *Euonymus europaeus*
- 100 *Euphorbia cyparissias*
- 101 *Euphorbia falcata*
- 102 *Euphorbia helioscopia*
- 103 *Euphorbia spp.*
- 104 *Fagus spp.*
- 105 *Ficaria verna (Ranunculus ficaria)*
- 106 *Filago spp.*
- 107 *Filipendula ulmaria*
- 108 *Forsythia vahl*
- 109 *Fragaria vesca*
- 110 *Frangula alnus*
- 111 *Fraxinus excelsior*
- 112 *Fumaria officinale*
- 113 *Gagea lutea*
- 114 *Galeopsis angustifolium*
- 115 *Galeopsis spp.*
- 116 *Galium aparine*
- 117 *Galium odoratum*
- 118 *Galium verum*
- 119 *Gallium mollugo*
- 120 *Genista tinctoria*
- 121 *Gentiana ciliata*
- 122 *Geranium pratense*
- 123 *Geranium pyrenaicum*
- 124 *Geranium robertanum*
- 125 *Geranium sanguineum*
- 126 *Geranium spp.*
- 127 *Geum urbanum*
- 128 *Glechoma hederacea*
- 129 *Helianthemum nummularium*
- 130 *Helianthemum spp.*
- 131 *Helianthemum apeninum*
- 132 *Helianthus annuus*
- 133 *Hippocrepis comosa*
- 134 *Hiracium murorum*
- 135 *Hiracium spp.*
- 136 *Hypericum spp.*
- 137 *Ilex aquifolium*
- 138 *Impatiens parviflora*

- 139 *Inula salicina*
- 140 *Iris spp.*
- 141 *Isatis tinctoria*
- 142 *Juglans regia*
- 143 *Knautia arvensis*
- 144 *Laburnum anagyroides*
- 145 *Lactuca serriola*
- 146 *Lamium album*
- 147 *Lamium amplexicaule*
- 148 *Lamium galeobdolon*
- 149 *Lamium maculatum*
- 150 *Lamium purpureum*
- 151 *Lamium spp.*
- 152 *Lapsana communis*
- 153 *Larix spp.*
- 154 *Lathyrus latifolius*
- 155 *Lathyrus pratensis*
- 156 *Lathyrus spp.*
- 157 *Lathyrus sylvestris*
- 158 *Lathyrus tuberosus*
- 159 *Lathyrus vernus*
- 160 *Leucanthemum vulgare*
- 161 *Ligustrum spp.*
- 162 *Linaria vulgaris*
- 163 *Linda spp.*
- 164 *Linum spp.*
- 165 *Lonicera periclymen*
- 166 *Lonicera tatarica*
- 167 *Lonicera xylosteum*
- 168 *Lotus corniculatus*
- 169 *Lunaria rediviva*
- 170 *Lupinus spp.*
- 171 *Lythrum salicaria*
- 172 *Malus spp.*
- 173 *Malva spp.*
- 174 *Matricaria chamomilla*
- 175 *Medicago lupulina*
- 176 *Medicago sativa*
- 177 *Medicago spp.*
- 178 *Melampyrum arvense*
- 179 *Melilotus albus*
- 180 *Melilotus officinale*
- 181 *Mespilus germanica*
- 182 *Muscari neglectum*
- 183 *Mycelis muralis*
- 184 *Myosotis arvensis*
- 185 *Myosotis spp.*

- 186 *Oenothera biennis*
- 187 *Onobrychis viciifolia*
- 188 *Ononis repens*
- 189 *Ononis spinosa*
- 190 *Ophrys apifera*
- 191 *Orchis militaris*
- 192 *Orchis purpurea*
- 193 *Origanum vulgare*
- 194 *Papaver roheas*
- 195 *Pastinaca sativa*
- 196 *Phacelia spp.*
- 197 *Picea spp.*
- 198 *Picris hieracioides*
- 199 *Pinus spp.*
- 200 *Plantago lanceolata*
- 201 *Plantago major*
- 202 *Planthera bifolia*
- 203 *Platanthera chlorantha*
- 204 *Polygala amara*
- 205 *Potentilla reptans*
- 206 *Primula spp.*
- 207 *Prunella grandiflora*
- 208 *Prunella vulgaris*
- 209 *Prunus avium*
- 210 *Prunus mahaleb*
- 211 *Prunus padus*
- 212 *Prunus spinosa*
- 213 *Prunus spp.*
- 214 *Pulsatilla vulgaris*
- 215 *Pyrus spp.*
- 216 *Quercus spp.*
- 217 *Rannuculus spp.*
- 218 *Rhinanthus alectorolophus*
- 219 *Rhinanthus spp.*
- 220 *Robinia pseudoacacia*
- 221 *Rosa spp.*
- 222 *Rubus spp.*
- 223 *Salix spp.*
- 224 *Salvia pratense*
- 225 *Salvia verticillata*
- 226 *Sambucus spp.*
- 227 *Saponaria spp.*
- 228 *Saxifraga granulata*
- 229 *Scilla bifolia*
- 230 *Securigera varia*
- 231 *Sedum acre*
- 232 *Sedum rupestre*

- 233 *Sedum spp.*
- 234 *Sedum spurium*
- 235 *Senecio jacobea*
- 236 *Senecio ovatus*
- 237 *Senecio spp.*
- 238 *Senecio vulgaris*
- 239 *Silene dioica*
- 240 *Silene flos-cuculi*
- 241 *Silene latifolia*
- 242 *Silene nutans*
- 243 *Silene spp.*
- 244 *Silene viscaria*
- 245 *Silene vulgaris*
- 246 *Sinapis arvensis*
- 247 *Solanum nigrum*
- 248 *Solidago virgaurea*
- 249 *Sonchus asper*
- 250 *Sonchus spp.*
- 251 *Sorbus aucuparia*
- 252 *Sorbus torminales*
- 253 *Stachys officinalis (Betonica officinalis)*
- 254 *Stachys palustris*
- 255 *Stachys recta*
- 256 *Stachys spp.*
- 257 *Stellaria holostea*
- 258 *Stellaria media*
- 259 *Stellaria spp.*
- 260 *Symphytum officinale*
- 261 *Syringa vulgaris*
- 262 *Tanacetum corymbosum*
- 263 *Tanacetum parthenium*
- 264 *Tanacetum vulgare*
- 265 *Taraxacum officinale*
- 266 *Taraxacum spp.*
- 267 *Tetragonolobus maritimus*
- 268 *Teucrium botrys*
- 269 *Teucrium chamaedrys*
- 270 *Thlaspi perfoliatum*
- 271 *Thymus pulegoides*
- 272 *Tilia spp.*
- 273 *Tragopogon pratense*
- 274 *Trifolium spp.*
- 275 *Tripleurospermum maritimum; syn. perforatum*
- 276 *Trollius spp.*
- 277 *Tulipa spp.*
- 278 *Tussilago farfara*
- 279 *Valeriana officinalis*

- 280 *Verbascum lynchitis*
- 281 *Veronica chamydris*
- 282 *Viburnum lantana*
- 283 *Viburnum opulus*
- 284 *Vicia cracca*
- 285 *Vicia sepium*
- 286 *Vinca min*
- 287 *Vincetoxicum hirundinaria*
- 288 *Viola arvensis*
- 289 *Viola reichenbachiana*
- 290 *Viola spp.*
- 291 *Viola tricolor*
- 292 *Zea mays*
