# Supplementary material for: Increased efficiency in identifying mixed pollen samples by meta-barcoding with a dual-indexing approach
Source: PubMed Central journal article supplement (PMC4509727; doi:10.1186/s12898-015-0051-y), 2015-07-22
Supplement: 12898_2015_51_MOESM2_ESM.pdf [file 12898_2015_51_MOESM2_ESM.pdf]

Table S1: Comparison of the number of genera per order for all orders.

| Order             | TaxID   | Genera old | Genera new |
|-------------------|---------|------------|------------|
| Acorales          | 91812   | 1          | 1          |
| Acrosiphoniales   | 66259   | 0          | 3          |
| Alismatales       | 16360   | 24         | 69         |
| Andreaeales       | 13794   | 0          | 1          |
| Anthocerotales    | 13810   | 0          | 1          |
| Apiales           | 4036    | 319        | 406        |
| Aquifoliales      | 91883   | 3          | 4          |
| Araucariales      | 1446378 | 10         | 22         |
| Arecales          | 40551   | 44         | 70         |
| Asparagales       | 73496   | 628        | 837        |
| Asterales         | 4209    | 887        | 1211       |
| Austrobaileyales  | 82956   | 3          | 3          |
| Bartramiales      | 1034061 | 0          | 8          |
| Boraginales       | 1538097 | 69         | 107        |
| Brassicales       | 3699    | 148        | 360        |
| Bruniales         | 703243  | 1          | 12         |
| Bryales           | 3226    | 14         | 17         |
| Bryopsidales      | 33104   | 2          | 10         |
| Bryoxiphiales     | 404270  | 0          | 1          |
| Buxales           | 280577  | 3          | 6          |
| Buxbaumiales      | 404267  | 0          | 1          |
| Canellales        | 71187   | 13         | 13         |
| Caryophyllales    | 3524    | 216        | 422        |
| Celastrales       | 233875  | 47         | 78         |
| Ceratophyllales   | 91811   | 1          | 1          |
| Chaetophorales    | 31299   | 1          | 10         |
| Charales          | 204509  | 1          | 2          |
| Chlamydomonadales | 3042    | 23         | 34         |
| Chloranthales     | 261008  | 2          | 3          |
| Chlorellales      | 35460   | 11         | 28         |
| Chlorocystidales  | 578868  | 1          | 1          |
| Chlorodendrales   | 35426   | 1          | 2          |
| Chlorosarcinales  | 138177  | 0          | 1          |
| Cladophorales     | 3183    | 1          | 18         |
| Commelinales      | 4739    | 0          | 1          |
| Cornales          | 41934   | 6          | 14         |
| Crossosomatales   | 232392  | 4          | 5          |
| Cucurbitales      | 71239   | 68         | 85         |
| Cupressales       | 1446379 | 26         | 31         |
| Cyatheales        | 693763  | 0          | 4          |
| Cycadales         | 3297    | 10         | 10         |

Table S1: Comparison of the number of genera per order for all orders.

| Order             | TaxID   | Genera old | Genera new |
|-------------------|---------|------------|------------|
| Dasycladales      | 3134    | 0          | 1          |
| Dendrocerotales   | 400689  | 0          | 4          |
| Desmidiiales      | 131210  | 2          | 8          |
| Dicranales        | 3219    | 11         | 35         |
| Dilleniales       | 403665  | 0          | 2          |
| Dioscoreales      | 40548   | 4          | 12         |
| Dipsacales        | 4199    | 26         | 41         |
| Dolichomastigales | 1525213 | 1          | 2          |
| Ephedrales        | 3385    | 0          | 1          |
| Equisetales       | 3255    | 0          | 1          |
| Ericales          | 41945   | 173        | 285        |
| Fabales           | 72025   | 413        | 524        |
| Fagales           | 3502    | 37         | 38         |
| Fossombroniales   | 186784  | 3          | 1          |
| Funariales        | 3215    | 1          | 7          |
| Garryales         | 91889   | 2          | 3          |
| Gentianales       | 4055    | 401        | 624        |
| Geraniales        | 41943   | 3          | 15         |
| Gigaspermales     | 1031676 | 0          | 3          |
| Ginkgoales        | 3308    | 0          | 1          |
| Gnetales          | 3378    | 1          | 1          |
| Grimmiales        | 64936   | 5          | 8          |
| Gunnerales        | 232382  | 1          | 1          |
| Hedwigiales       | 114664  | 0          | 2          |
| Hookeriales       | 65545   | 13         | 38         |
| Hypnales          | 13798   | 198        | 261        |
| Hypnodendrales    | 480566  | 0          | 3          |
| Ignatiales        | 231076  | 0          | 1          |
| Isoetales         | 13836   | 1          | 1          |
| Jungermanniales   | 3199    | 26         | 69         |
| Klebsormidiales   | 3172    | 4          | 5          |
| Lamiales          | 4143    | 457        | 702        |
| Laurales          | 3432    | 47         | 65         |
| Liliales          | 4667    | 18         | 43         |
| Lycopodiales      | 3249    | 0          | 4          |
| Magnoliales       | 3400    | 4          | 14         |
| Malpighiales      | 3646    | 161        | 257        |
| Malvales          | 41938   | 145        | 180        |
| Mamiellales       | 13792   | 3          | 5          |
| Marchantiales     | 28908   | 2          | 8          |
| Metzgeriales      | 34158   | 3          | 3          |

Table S1: Comparison of the number of genera per order for all orders.

| Order            | TaxID   | Genera old | Genera new |
|------------------|---------|------------|------------|
| Microthamniales  | 42111   | 4          | 6          |
| Monomastigales   | 1525214 | 1          | 1          |
| Myrtales         | 41944   | 152        | 252        |
| Notothyladales   | 400691  | 0          | 2          |
| Nymphaeales      | 261007  | 3          | 8          |
| Oedogoniales     | 35490   | 3          | 3          |
| Orthotrichales   | 64937   | 0          | 4          |
| Oxalidales       | 71243   | 6          | 18         |
| Pallaviciniales  | 402723  | 5          | 6          |
| Pandanales       | 40550   | 1          | 9          |
| Pedinomonadales  | 35423   | 0          | 1          |
| Pelliales        | 400718  | 1          | 1          |
| Pinales          | 1446380 | 10         | 11         |
| Piperales        | 16736   | 7          | 12         |
| Poales           | 38820   | 366        | 570        |
| Polypodiales     | 3268    | 4          | 10         |
| Polytrichales    | 3210    | 9          | 10         |
| Porellales       | 186798  | 45         | 68         |
| Pottiales        | 38585   | 24         | 46         |
| Prasinococcales  | 485343  | 0          | 1          |
| Prasiolales      | 135250  | 0          | 1          |
| Proteales        | 232378  | 70         | 70         |
| Psilotales       | 3237    | 1          | 1          |
| Ptilidiales      | 984499  | 1          | 1          |
| Ptychomniales    | 404314  | 1          | 4          |
| Pyramimonadales  | 38834   | 0          | 2          |
| Ranunculales     | 41768   | 78         | 137        |
| Rhizogoniales    | 114662  | 1          | 2          |
| Rosales          | 3744    | 110        | 219        |
| Salviniales      | 74353   | 0          | 3          |
| Santalales       | 41947   | 13         | 62         |
| Sapindales       | 41937   | 171        | 240        |
| Saxifragales     | 41946   | 71         | 105        |
| Schizaeales      | 693762  | 0          | 1          |
| Scouleriales     | 404269  | 0          | 2          |
| Selaginellales   | 3244    | 1          | 1          |
| Solanales        | 4069    | 67         | 84         |
| Sphaerocarpaceae | 37407   | 0          | 2          |
| Sphaeropleales   | 35491   | 18         | 43         |
| Sphagnales       | 13802   | 0          | 2          |
| Splachnales      | 64938   | 0          | 4          |

Table S1: Comparison of the number of genera per order for all orders.

| Order           | TaxID  | Genera old | Genera new |
|-----------------|--------|------------|------------|
| Takakiales      | 70832  | 0          | 1          |
| Tetraphidales   | 37417  | 1          | 1          |
| Tetrasporales   | 31305  | 2          | 6          |
| Timmiales       | 114659 | 0          | 1          |
| Trentepohliales | 35443  | 0          | 2          |
| Trochodendrales | 400839 | 1          | 2          |
| Ulotrichales    | 31306  | 0          | 11         |
| Ulvaes          | 3113   | 8          | 14         |
| Vitales         | 403667 | 1          | 7          |
| Welwitschiales  | 3374   | 0          | 1          |
| Zingiberales    | 4618   | 78         | 87         |
| Zygnematales    | 3176   | 0          | 2          |
| Zygophyllales   | 403666 | 8          | 11         |
| Coleochaetales  | 204510 | 1          | 0          |
