# Supplementary material for: Increased efficiency in identifying mixed pollen samples by meta-barcoding with a dual-indexing approach
Source: PubMed Central journal article supplement (PMC4509727; doi:10.1186/s12898-015-0051-y), 2015-07-22
Supplement: 12898_2015_51_MOESM3_ESM.pdf [file 12898_2015_51_MOESM3_ESM.pdf]

Table S2: Comparison of the number of sequences per group for selected taxonomic groups.

| Group              | old | new |
|--------------------|-----|-----|
| Vitaceae           | 1   | 62  |
| <i>Heracleum</i>   | 80  | 414 |
| <i>Carduus</i>     | 10  | 19  |
| <i>Phacelia</i>    | 34  | 176 |
| <i>Convolvulus</i> | 161 | 230 |
| <i>Helianthus</i>  | 72  | 80  |
